# Supplementary material for: Simultaneous Quantification and Differentiation of Streptococcus suis Serotypes 2 and 9 by Quantitative Real-Time PCR, Evaluated in Tonsillar and Nasal Samples of Pigs
Source: Pathogens. 2016 Jun 30;5(3):46. doi: 10.3390/pathogens5030046 (PMC5039426; doi:10.3390/pathogens5030046)
Supplement: Supplementary file 1 [file pathogens-05-00046-s001.xlsx]

## Sheet: Table S1
	Table S1: Quantitative bacteriological and qPCR data of individual nasal and tonsillar samples
						SBE results	PCR results (log 10 equivalent CFU /mL)
	Sample no.	Sample type	Exposure mode	Time (days post inoculation)	Serotype exposure	(log10 CFU/mL)	cps2J	cps9H	cps2J+cps9H
	1	Tonsil brushing	contact	3	2	neg*	5.18865	neg	5.18921
	2	Tonsil brushing	contact	3	2	4.3	4.86451	neg	4.86
	3	Tonsil brushing	contact	6	2	6.49	6.78817	neg	6.78818
	4	Tonsil brushing	contact	6	2	6.31	6.01368	neg	6.01376
	5	Tonsil brushing	contact	6	2	6.51	5.69548	neg	5.69566
	6	Tonsil brushing	contact	6	2	5.88	6.67943	neg	6.67945
	7	Tonsil brushing	contact	6	2	6.15	5.83506	neg	5.83518
	8	Tonsil brushing	contact	9	2	>6.60	6.90634	neg	6.90635
	9	Tonsil brushing	contact	9	2	>6.60	6.07188	neg	6.07196
	10	Tonsil brushing	contact	9	2	5.75	6.01115	neg	6.01111
	11	Tonsil brushing	inoculated	3	2	5.15	6.28511	neg	6.28515
	12	Tonsil brushing	inoculated	3	2	6.13	6.9284	neg	6.92841
	13	Tonsil brushing	inoculated	3	2	6.33	6.79796	neg	6.79797
	14	Tonsil brushing	inoculated	3	2	>6.60	7.68305	neg	7.68305
	15	Tonsil brushing	inoculated	6	2	6.68	7.32222	neg	7.32222
	16	Tonsil brushing	contact	3	9	neg	neg	3.02119	3.02119
	17	Tonsil brushing	contact	3	9	5.62	neg	6.43775	6.43778
	18	Tonsil brushing	contact	3	9	5.87	neg	6.69723	6.69725
	19	Tonsil brushing	contact	6	9	>6.60	neg	6.29137	6.29141
	20	Tonsil brushing	contact	6	9	6.47	neg	6.62737	6.62739
	21	Tonsil brushing	contact	6	9	5.7	neg	6.55871	6.55873
	22	Tonsil brushing	contact	9	9	6.78	neg	5.93952	5.93962
	23	Tonsil brushing	contact	9	9	6.52	neg	6.66652	6.66654
	24	Tonsil brushing	contact	17	9	5.73	neg	6.49693	6.49696
	25	Tonsil brushing	inoculated	3	9	5.14	neg	5.74351	5.74367
	26	Tonsil brushing	inoculated	3	9	5.76	neg	6.84136	6.84104
	27	Tonsil brushing	inoculated	3	9	5.85	neg	6.14737	6.14743
	28	Tonsil brushing	inoculated	6	9	5.79	neg	6.26858	6.26862
	29	Tonsil brushing	inoculated	6	9	6.52	neg	6.85126	6.85104
	30	Tonsil brushing	inoculated	6	9	6.75	neg	6.43457	6.4346
	31	Tonsil brushing	inoculated	9	9	6.2	neg	5.98408	5.98417
	32	Tonsil brushing	inoculated	9	9	6.53	neg	6.71096	6.71105
	33	Tonsil brushing	inoculated	17	9	5.59	neg	6.13481	6.13488
	34	Tonsil brushing	contact	3	2+9	4.26	2.97035	4.41162	4.42649
	35	Tonsil brushing	contact	3	2+9	neg	neg	2.30963	2.30963
	36	Tonsil brushing	contact	3	2+9	neg	neg	4.47129	4.47396
	37	Tonsil brushing	contact	6	2+9	4.11	5.47712	5.91698	6.05154
	38	Tonsil brushing	contact	6	2+9	6.11	6.33846	6.57287	6.77232
	39	Tonsil brushing	contact	6	2+9	5.43	4.549	6.34635	6.35322
	40	Tonsil brushing	contact	6	2+9	4.66	3.64345	4.64542	4.68664
	41	Tonsil brushing	contact	6	2+9	5	4.85003	4.99123	5.22726
	42	Tonsil brushing	contact	6	2+9	5.78	4.70927	5.84757	5.87806
	43	Tonsil brushing	contact	9	2+9	>6.60	7.00604	7.08636	7.34908
	44	Tonsil brushing	contact	9	2+9	5.92	5.38382	6.54654	6.57542
	45	Tonsil brushing	contact	9	2+9	6.25	5.51055	6.5611	6.59811
	46	Tonsil brushing	contact	17	2+9	6.53	7.09482	6.0983	7.13653
	47	Tonsil brushing	contact	17	2+9	4.15	6.47422	5.031	6.48959
	48	Tonsil brushing	contact	17	2+9	5.79	6.80754	5.90741	6.85902
	49	Tonsil brushing	inoculated	3	2+9	5.21	5.37658	5.70243	5.8704
	50	Tonsil brushing	inoculated	3	2+9	5.41	5.2079	3.90849	5.22917
	51	Tonsil brushing	inoculated	3	2+9	6.26	6.77525	7.01452	7.21219
	52	Tonsil brushing	inoculated	3	2+9	5.34	6.03822	3.95809	6.04182
	53	Tonsil brushing	inoculated	3	2+9	6.31	6.51587	5.54654	6.56015
	54	Tonsil brushing	inoculated	3	2+9	5.95	6.16791	5.63749	6.28012
	55	Tonsil brushing	inoculated	3	2+9	5.62	6.39094	5.62118	6.45915
	56	Tonsil brushing	inoculated	6	2+9	6.18	6.86806	6.19089	6.95097
	57	Tonsil brushing	inoculated	6	2+9	6.43	7.0892	6.49136	7.18689
	58	Tonsil brushing	inoculated	6	2+9	6.56	6.36549	6.63347	6.82086
	59	Tonsil brushing	inoculated	6	2+9	6.35	7.03423	5.39094	7.04399
	60	Tonsil brushing	inoculated	9	2+9	6.39	6.78533	6.49415	6.96473
	61	Tonsil brushing	inoculated	9	2+9	6.2	6.84261	6.86688	7.15594
	62	Tonsil brushing	inoculated	17	2+9	6.55	7.71933	6.95231	7.78789
	63	Tonsil brushing	inoculated	17	2+9	5.51	6.57054	6.22376	6.73225
	64	Nasal swab	contact	3	2	4.93	4.85126	neg	4.85225
	65	Nasal swab	contact	3	2	2.7	3.4216	neg	3.4216
	66	Nasal swab	contact	6	2	5.59	6.15229	neg	6.15235
	67	Nasal swab	contact	6	2	4.24	3.68124	neg	3.68124
	68	Nasal swab	contact	6	2	5.58	5.54654	neg	5.54679
	69	Nasal swab	contact	6	2	5.66	5.70927	neg	5.70944
	70	Nasal swab	contact	6	2	5.68	5.93651	neg	5.93661
	71	Nasal swab	contact	9	2	5.85	6.77379	neg	6.7738
	72	Nasal swab	contact	9	2	5.85	7.10992	neg	7.10992
	73	Nasal swab	contact	9	2	5.92	7.35793	neg	7.35794
	74	Nasal swab	inoculated	3	2	5.98	6.24403	neg	6.24408
	75	Nasal swab	inoculated	3	2	6.21	5.29447	neg	5.29491
	76	Nasal swab	inoculated	6	2	5.86	6.16495	neg	6.16495
	77	Nasal swab	contact	3	9	neg	neg	3.39794	3.39794
	78	Nasal swab	contact	3	9	2	neg	3.45332	3.45332
	79	Nasal swab	contact	3	9	2.9	neg	3.27091	3.27091
	80	Nasal swab	contact	6	9	5.25	neg	4.60638	4.60638
	81	Nasal swab	contact	6	9	4.62	neg	4.78104	4.78104
	82	Nasal swab	contact	6	9	4.55	neg	3.70415	3.70415
	83	Nasal swab	contact	9	9	5.7	neg	4.6149	4.6149
	84	Nasal swab	contact	9	9	4.78	neg	3.95999	3.95999
	85	Nasal swab	inoculated	3	9	4.66	neg	4.23654	4.23654
	86	Nasal swab	inoculated	3	9	>6.60	neg	5.39794	5.39794
	87	Nasal swab	inoculated	6	9	3.41	neg	4.33041	4.33041
	88	Nasal swab	inoculated	6	9	4.92	neg	4.71933	4.71933
	89	Nasal swab	inoculated	6	9	6	neg	6.24155	6.24155
	90	Nasal swab	inoculated	9	9	4.51	neg	4.64147	4.64147
	91	Nasal swab	inoculated	9	9	4.76	neg	5.09482	5.09482
	92	Nasal swab	inoculated	17	9	3.08	neg	3.45637	3.45637
	93	Nasal swab	contact	3	2+9	2.2	2.7007	2.86688	3.09285
	94	Nasal swab	contact	3	2+9	neg	2.33846	neg	2.33846
	95	Nasal swab	contact	3	2+9	neg	3.27277	2.62531	3.36097
	96	Nasal swab	contact	3	2+9	1.78	2.33846	2.80346	2.93146
	97	Nasal swab	contact	6	2+9	3.9	2.60206	3.31387	3.39077
	98	Nasal swab	contact	6	2+9	4.3	4.05994	4.30103	4.49803
	99	Nasal swab	contact	6	2+9	3.73	2.30103	3.85733	3.86923
	100	Nasal swab	contact	6	2+9	4.56	2.33846	3.716	3.73384
	101	Nasal swab	contact	6	2+9	5.78	3.22324	5.1726	5.17746
	102	Nasal swab	contact	6	2+9	5.78	6.11661	3.35411	6.11736
	103	Nasal swab	contact	9	2+9	5.11	4.55145	4.49969	4.82778
	104	Nasal swab	contact	15	2+9	>6.60	5.24502	6.09132	6.14891
	105	Nasal swab	contact	17	2+9	4.45	2.44716	3.39445	3.44091
	106	Nasal swab	contact	17	2+9	3.62	4.33041	3.42813	4.38166
	107	Nasal swab	inoculated	1	2+9	>6.60	6.49693	5.18808	6.51775
	108	Nasal swab	inoculated	3	2+9	5.43	4.96379	3.58659	4.98164
	109	Nasal swab	inoculated	3	2+9	>6.60	5.93044	5.41162	6.04532
	110	Nasal swab	inoculated	3	2+9	4.3	3.41162	3.62118	3.82972
	111	Nasal swab	inoculated	3	2+9	>6.60	6.15412	5.65514	6.2737
	112	Nasal swab	inoculated	6	2+9	4.56	4.43136	3.49969	4.47927
	113	Nasal swab	inoculated	6	2+9	6	6.97772	6.45025	7.09079
	114	Nasal swab	inoculated	6	2+9	5.3	4.38021	4.53148	4.7635
	115	Nasal swab	inoculated	6	2+9	5.78	5.03181	5.07773	5.35641
	116	Nasal swab	inoculated	9	2+9	3.66	3.37658	3.14239	3.57611
	117	Nasal swab	inoculated	9	2+9	6.58	2.44716	5.32222	5.32161
	118	Nasal swab	inoculated	15	2+9	6.51	5.65128	5.28735	5.80723
	X1*	Nasal swab	contact	17	9	6.37658	neg	2.69373	2.69373
	X2*	Nasal swab	inoculated	17	2+9	5.5977	2.3	2.44716	2.68124
	* 'neg' means negative in the corresponding test
	**in samples X1 and X2 the internal control crossing point values exceeded the cut-off values, and therefore these samples were excluded from quantitative load analysis
